# Supplementary material
Source: publisher figshare collection journal article supplement (https://sage.figshare.com/ndownloader/files/22882073)
Supplement: Supplementary file 1 [file 22882073]

## Sheet: Table 1 - Summary
Table 1. Summary of studies included in analysis.
Study Author (year)	Type of study	Evidence Level	Sample size, joints	Average age, years ± SD (range)	Male	Female	Average follow-up, months ± SD (range)	Number of joints, Comparator	Number of joints, Intervention
Kirzner et al. (2018)	Retrospective cohort study	III	40	74.7 (59 -91)	9	31	20 (12-48)	RSA (22)	BIO-RSA (18)
Boileau et al. (2017)	Case series	IV	54	73 (52-85)	13	41	36 (24-81)	-	BIO-RSA (54)
Boileau et al. (2011)	Prospective cohort study	IV	42	72 (52–86)	14	28	28 (24-40)	Grammont "literature" (484)	BIO-RSA (42)
Greiner et al. (2015)	Randomized controlled trial	I	31	75.4 (66-88)	9	22	22 ± 8.1	STD RSA (15)	BIO-RSA (16)
Athwal et al. (2015)	Retrospective Cohort study	III	40	74 ± 6	17	23	34 ± 13	Grammont style RSA (20)	BIO-RSA (20)
Collin et al. (2018)	Retrospective comparative cohort study	III	130	BIO-RSA 74.4 (58-90) tRSA 75.4 (60-86)	34	96	24 (24-27)	tRSA (69)	BIO-RSA (61)
Athwal and Faber (2015)	Retrospective cohort study	III	24	75 (66-84)	4	20	36 ± 8	25mm metal baseplate RSA (11)	25mm baseplate BIO-RSA (13)
Boutsiadis et al. (2018)	Retrospective cohort study	III	46 (22 PFSCS** excluded)	77 (62-90)	9 (assume 4 PFSCS - excluded*)	37 (assume 18 PFSCS - excluded*)	39 ± 18	STD-RSA Grammont (13) STD-RSA Ascent (10)	BIO-RSA Grammont (11) BIO-RSA Ascent (12)
* PFSCS - Press fit short curved stem (Ascent) - gender of patients not specified

## Sheet: Table 2 - Indications
Table 2. Indications for joint arthroplasty and exclusion criteria for analysed studies.
INDICATION :	Cuff arthropathy	OA	Fracture	Other	Total	Cuff arthropathy	OA	Fracture	Other	Total	Exclusion criteria
Study (author, year)	STD-RSA (Number of joints)					BIO-RSA (Number of joints)					Glenoid bone stock morphology excluded	Other criteria
Kirzner et al. (2018)	5	1	10	6 (AVN, malunion, dislocation)	22	5	11	0	2 (AVN, malunion, dislocation)	18	All glenoid bone (Walch) morphologies included	Pre-op acromial abnormality Stress fractures
Boileau et al. (2017)	-	-	-	-	0	31	15	2 (fracture sequelae)	6 (RA)	54	All glenoid bone morphologies included	Revision RSA Other bone graft (allograft, iliac crest) rather than humeral head
Boileau et al. (2011)	-	-	-	-	0	27	-	3	12 (previous RC surgery with pseudoparalysed shoulder)	42	Favard E3 Walch B2, C	Other bone graft (allograft, iliac crest) rather than humeral head
Greiner et al. (2015)	15	-	-	-	15	16	-	-	-	16	Favard E3 Walch B2, C	Unable to harvest graft from humeral head
Athwal et al. (2015)	20	-	-	-	20	20	-	-	-	20	Bone loss requiring grafting/augment	Rheumatoid and/or inflammatory arthritis, osteoarthritis, fracture, nonunion, malunion, prior open shoulder surgery, workers’ compensation claims, unresolved litigation
Collin et al. (2018)	61	6	-	2 (massive cuff tear)	69	48	12	-	1 (massive cuff tear)	61	Any glenoid bone loss	Fracture sequelae, history of infection, presence of neurologic problems (e.g. Parkinson disease)
Athwal and Faber (2015)	11	-	-	-	11	13	-	-	-	13	-	Osteoarthritis, inflammatory arthritis, revision surgery, fracture, nonunion, malunion, concurrent procedures
Boutsiadis et al. (2018)	13	-	-	-	13	11	-	-	-	11	Not specified but no excessive deformity (E3 glenoids) in cohort	Revision RSA, RSA for proximal humeral fracture, preoperative teres minor fatty infiltration with concomitant latissimus dorsi transfer, postinfection RSA, primary glenohumeral arthritis, incomplete followup
TOTALS	125 (83%)	7 (5%)	10 (7%)	8 (5%)	150	171 (73%)	38 (16%)	5 (2%)	21 (9%)	235

## Sheet: Table 3 - PROMS
Table 3. Summary of outcome scores in studies included in analysis
Outcomes (bad - good)	Study	Intervention BIO-RSA Mean ± SD (range) [no. of joints]	Comparator (STD-RSA unless specified) Mean ± SD (range) [no. of joints]	Mean difference in post-op score [95% CI] (where able to pool data)
Constant Murley Score (0 - 100)	Athwal et al. (2015)	Post-op: 61± 12 [20]	Post-op: 61 ± 10 [20]	4.0 [0.8, 7.1] I2 = 47%
	Boutsiadis et al. (2018)*	Pre-op: 19 ± 3.5 (2-33) Post-op: 65 ± 2 (53-77) Change: +46 ± 8 (37-60) [11]	Pre-op: 23 ± 3 (12-45) Post-op: 62 ± 3 (45-71) Change: +39 ± 11 (13-58) [13]
	Collin et al. (2018)	Pre-op: 26.6 ± 12.2 (3 - 56) Post-op: 69.0 ± 9.4 (40 - 85) Change: +42.4 [61]	Pre-op: 19.5 ± 10.8 (4 - 44) Post-op: 61.4 ± 12.7 (29 - 88) Change: +41.9 [69]
	Greiner et al. (2015)	Pre-op: 28.1 ± 13.2 Post-op: 64.1 ± 18.4 Change: +36 [16]	Pre-op: 26.1 ± 15.1 Post-op: 61.5 ± 16.0 Gain: +35.4 [15]
	Boileau et al. (2017)	Pre-op: 31 (9-62) Post-op: 68 (30-89) Change: +37 [54]
	Boileau et al. (2011)	Pre-op 31 ± 13 (8–60) Post-op 66.6 ± 11 (31–88) Change: +35.6 [42]	Grammont RSA (literature) vs BIO-RSA Post-op: 62 vs. 66
	Athwal and Faber (2015)	Post-op: 60 ± 10
DASH (100 - 0)	Athwal et al. (2015)	Post-op: 21 ± 17 [20]	Post-op: 15 ± 15 [20]	6.2 [-2.0, -14] I2 = 0%
	Greiner et al. (2015)	Pre-op: 60.6 ± 13 Post-op: 40.9 ± 23.7 Change: -19.7 [16]	Pre-op: 66.5 ± 11.5 Post-op: 34.2 ± 20.2 Change: -32.3 [15]
	Athwal and Faber (2015)	Post-op: 18 +/-15
SSV (0-100%)	Boutsiadis et al. (2018)*	Post-op: 77 ± 4 (50-90) [11]	Post-op: 70 ± 4 (50-90) [13]	6.8 [3.7, 9.9] I2 = 0%
	Kirzner et al. (2018)	Post-op: 63.5 ± 25.7 (5–100) [18]	Post-op: 60.2 ± 1.8 (20–95) [22]
	Boileau et al. (2017)	Pre-op 30 (10-60) Post-op 83 (0-100) Change: +53 [54]	-
	Boileau et al. (2011)	Pre-op 34 ± 16 (10-80) Post-op 75± 14 (30-95) Change: +41 [42]	-
ASES (0 - 100)	Athwal et al. (2015)	Post-op: 68 ± 12 [20]	Post-op: 70 ± 10 [20]	1.5 [-1.4, 4.3] I2 = 0%
	Boutsiadis et al. (2018)*	Post-op: 77 ± 4 (57-98) [11]	Post-op: 75 ± 4 (53-98) [13]
	Kirzner et al. (2018)	Post-op: 73 ± 18.7 (24-93) [18]	Post-op: 67.5 ± 23.8 (23-100) [22]
	Athwal and Faber (2015)	Post-op: 70 ± 10
SST ( 0 - 12 )	Athwal et al. (2015)	Post-op: 9.3 ± 2.6 [20]	Post-op: 9.8 ± 2.2 [20]	-0.06 [-0.57, 0.45] I2 = 0%
	Boutsiadis et al. (2018)*	Post-op: 7 ± 0.8 (3-11) [11]	Post-op: 7 ± 0.5 (4-11) [13]	-0.06 [-0.57, 0.45] I2 = 0%
	Athwal and Faber (2015)	Post-op: 10 ± 2
ADLER ( 0 - 30 )	Greiner et al. (2015)	Change: 12 ± 8.9 [16]	Change: 13.4 ±8.2 [15]
	Boutsiadis et al. (2018)*	Post-op: 27 ± 1 (14-30) [11]	Post-op: 26 ± 1(15-30) [13]
GRC ( -5 to +5 )	Athwal et al. (2015)	Post-op: 4.6 ± 0.4 [20]	Post-op: 4.8 ± 0.5 [20]
	Athwal and Faber (2015)	Post-op: 4.7 ± 0.4
WOOS ( 100 - 0 )	Kirzner et al. (2018)	Post-op: 31.4 ± 24.3 [18]	Post-op: 35.9 ± 30.3 [22]
Pain ( 0 - 100)	Kirzner et al. (2018)	Post-op: 15.3 ± 21.5 [18]	Post-op: 25.7 ± 27.2 [22]
* Boutsiadis paper: only Grammont style standard RSA and Grammont style BIO-RSA included (press fit stems excluded)

## Sheet: Table 4 - ROM
Table 4. Summary of ROM in studies included in analysis.
Outcomes	Study	Intervention BIO RSA Mean ± SD (range) [no. of joints]	Comparator (STD-RSA unless specified) Mean ± SD (range) [no. of joints]	Mean difference in post-op angle (95% CI) [where able to pool data]
Active internal rotation (Level)	Boileau et al. (2017)	Pre-op: S1 (0-T12) Post-op L4 (GT-D8) [54]	-
	Boileau et al. (2011)	Post-op: >S1 = 86% [42]	Grammont (literature) Post-op: >S1 = 26%
	Athwal et al. (2015)	Post-op: >T12 = 25% [20]	RSA Post-op: >T12 = 45% [20]
	Athwal and Faber (2015)	Post-op: SIJ
	Collin et al. (2018)	Pre-op: Sacrum (buttock to T8) Post-op: L4 (buttock to T8) [61]	tRSA Pre-op: Sacrum (buttock to T8 Post-op: L4 (buttock to T8) [69]
	Boutsiadis et al. (2018)*	Pre-op: Buttock (LT-SI) Post-op: L3 (buttock-T12) [11]	Pre-op: SI (buttock-T12) Post-op: L3 (buttock-T12) [13]
	Boileau et al. (2011)	Pre-op: 4.4 ± 2.2 (0 - 10) Post-op: 5.7 ± 2.5 (0 - 10) Gain: +1.3 (-10 - 10) [42]
Active external rotation, ° (at side or 0deg abduction)	Athwal et al. (2015)	Post-op: 23 ± 15 [20]	Post-op: 23 ± 16 [20]	4 [-0.8. 8.4] I2 = 6%
	Boutsiadis et al. (2018)*	Pre-op: 5 ± 20 (–30 to 40) Post-op: 24 ± 12 (0 to 40) Change: +19 ± 23(–15 to 60) [11]	Pre-op: 14 ± 20 (–30 to 50) Post-op: 14 ± 13 (–10 to 35) Change: 0 ± 30 (–30 to 50) [13]
	Collin et al. (2018)	Pre-op: 13.1 ± 19.9 (−40 to 70) Post-op: 20 ± 16 (0 to 60) Change: +6.9 [61]	Pre-op: 14.8 ± 16.3 (−10 to 70) Post-op: 17 ± 20 (−60 to 60) Change: +2.2 [69]
	Greiner et al. (2015)	Pre-op: 16 ± 31 Post-op: 44 (no SD given) Change: 28 ± 40 [16]	Pre-op: 22 ± 23 Post-op: 40 (No SD given) Change: 18 ± 26 [15]
	Boileau et al. (2017)	Preop: 12° (−20 to 60) Postop: 24° (−20 to 70) Change: +12° [54]	-
	Boileau et al. (2011)	Preop 12.8 ± 21.4 (-40–50) Postop 22.9 ± 16.4 (-10–70) Change: +10 (-20–60) [42]	Grammont (literature) Post-op: 13°
	Athwal and Faber (2015)	Post-op: 21 ± 15
Active external rotation, ° (in abduction)	Boileau et al. (2011)	Post-op: 53° [42]	Grammont (literature) Post-op: 42°
	Greiner et al. (2015)	Pre-op: 16 ± 31 Post-op: 58 Change: 42 ± 54 [16]	Pre-op: 26 ± 31 Post-op: 59 Change: 33 ± 42 [15]
Active forward flexion, °	Athwal et al. (2015)	Post-op: 140 ± 16 [20]	Post-op: 143 ± 13 [20]	6 [-1.4, 12.5] I2 = 69%
	Boutsiadis et al. (2018)*	Pre-op: 74 ± 35 (10 - 120) Post-op: 158 ± 4 (130 - 175) Change: 92 ± 37 (50 - 150) [11]	Pre-op: 63 ± 21 (10 - 100) Post-op:148 ± 7 (100 - 170) Change: 86 ± 36 (20 - 140) [13]
	Collin et al. (2018)	Pre-op: 86.1 ± 47.4 (0 - 170) Post-op: 145 ± 21 (90 - 180) Change: 58.9 [61]	Pre-op: 84.9 ± 33.2 (20 - 180) Post-op: 138 ± 20 (70 - 170) Change: 53.1 [69]
	Athwal and Faber (2015)	Post-op: 140 ± 15
	Boileau et al. (2011)	Pre-op: 86 ± 35 (20 - 160) Post-op: 146 ± 21 (80 - 170) Gain +60 (-20 - 130) [42]	Grammont (literature) Post-op: 130
	Boileau et al. (2017)	Pre-op: 85 (20 - 140) Post-op: 148 (80 - 170) [54]
Active abduction, °	Boutsiadis et al. (2018)*	Post-op: 145 ± 7 (100 - 170) [11]	Post-op: 134 ± 8.5 (90 - 170) [13]
* Boutsiadis paper: only Grammont style standard RSA and Grammont style BIO-RSA included (press fit stems excluded)

## Sheet: Table 5 - Radiological
Table 5. Summary of radiographic findings in studies included in analysis.
Outcomes	Study	Intervention BIO-RSA % [no. of joints]	Comparator (STD-RSA unless specified) % [no. of joints]	Odds ratio (95% CI) [where able to pool data]
Notching (present, ± grade)	Athwal et al. (2015)	Total: 40% (8/20) Grade 1: 35% (7/20) Grade 2: 5% (1/20) Grade 3: 0% (0/20) Grade 4: 0% (0/20) [20]	Total: 75% (15/20) Grade 1: 60% (12/20) Grade 2: 10% (2/20) Grade 3: 0% (0/20) Grade 4: 5% (1/20) [20]	0.19 (0.10, 0.38) I2 = 0%
	Athwal, Faber et al. (2015)	Total 46% (6/13) [13]	Total 82% (9/11) [11]
	Collin et al. (2018)	Total: 4.9% (3/61) Grade 1: 3.3% (2/61) Grade 2: 1.6% (1/61) Grade 3: 0% (0/61) Grade 4: 0% (0/61) Notch in graft: 6.6% (4/61) [61]	Total: 33.9% (19/69) Grade 1: 15.9% (11/69) Grade 2: 8.7% (6/69) Grade 3: 2.9% (2/69) Grade 4: 0% (0/69) [69]
	Kirzner et al. (2018)	Total 33.3% (6/18) [18]	Total 68.2% (16/22) [22]
	Greiner et al. (2015)	No grade III or IV [16]	[15]
	Boileau et al. (2017)	Total 25% (13/54) All grade I - III [54]
	Boileau et al. (2011)	Inferior Notching Total: 19% (8/42) Grade 1: 11.9% (5/42) Grade 2: 4.8% (2/42)) Grade 3: 2.4% (1/42 Grade 4: 0% (0/42) Posterior notch: 7.1% (3/42) [42]	Grammont vs BIO-RSA (%) 68% vs 19%
Scapula fracture	Greiner et al. (2015)	12.5% (2/16) [16]	13.3% (2/15) [15]	1.4 [0.35, 5.7] I2 = 0%
	Kirzner et al. (2018)	16.7% (3/18) [18]	9.1% (2/22) [22]
	Athwal, Faber et al.(2015)	15.4% (2/13) 1 introperative glenoid rim fracture 1 post op glenoid insufficiency fracture [13]
	Boileau et al. (2017)	1.9% (1/54) 1 post-op scapula spine fracture [54]
Loosening	Boileau et al. (2017)	Glenoid loosening 5.6% (3/54) all within 6 months 1 traumatic 1 infection 1 incorrect position [54]
	Athwal and Faber (2015)	No loosening in any case 0% (0/13) [13]
	Boileau et al. (2011)	0% (0/42) [42]	Grammont (literature) 3.6%
	Greiner et al. (2015)	Humeral component 0% (0/16) [16]
Healed/Graft incorporated	Boileau et al. (2011)	92% (41/42) [42]
	Greiner et al. (2015)	100% (16/16) [16]
	Athwal et al. (2015)	Complete: 80% (16/20) Incomplete: 20% (4/20) [20]
	Boileau et al. (2017)	94.4% (51/54) 3 glenoid loosening as above [54]
	Athwal and Faber (2015)	Full incorporation: 77% (10/13) Partial incorportation: 23% (3/13) [13]
Prosthetic instability	Boileau et al. (2011)	0% (0/42) [42]	Grammont RSA (Literature) 3.4%
Spur	Collin et al. (2018)	14.8% (9/61) [61]	7.2% (5/69) [69]
Ossification	Collin et al. (2018)	1.6% (1/61) [61]	7.2% (5/69) [69]
Other complication	Boileau et al. (2017)	1.9% (1/54) Infection 1.9% (1/54) Pulmonary embolism No dislocation No subluxation [54]
	Greiner et al. (2015)	0% graft resorption 0% lysis 0% radiolucent lines around pegs /screws [16]
